# Supplementary material
Source: PubMed Central journal article supplement (PMC8527361)
Supplement: jama-e2115333-s002.pdf [file jama-e2115333-s002.pdf]

## Supplemental Online Content

Baker TB, Piper ME, Smith SS, Bolt DM, Stein JH, Fiore MC. Effects of combined varenicline with nicotine patch and of extended treatment duration on smoking cessation: a randomized clinical trial. *JAMA*. doi:10.1001/jama.2021.15333

**eTable 1.** Medication dosing in the experimental conditions

**eTable 2A.** Results for logistic regression analyses under four assumptions about missing outcomes, biochemically-confirmed 7-day point prevalence abstinence rates (CO cutoff=5 ppm) at week 23

**eTable 2B.** Results for logistic regression analyses under four assumptions about missing outcomes, biochemically-confirmed 7-day point prevalence abstinence rates (CO cutoff=5 ppm) at week 52

**eTable 3.** Biochemically confirmed (CO  $\leq$  5 ppm) 7-day point prevalence abstinence rates at weeks 23 and 52, and prolonged abstinence by treatment factors, with 4 covariates

**eTable 4.** Biochemically-confirmed 7-day point prevalence abstinence rates (CO cutoff=5 ppm) at weeks 23 and 52, and prolonged abstinence by the 4 treatment conditions, with four prespecified covariates

**eTable 5.** Moderation analyses for a priori covariates and week 52 biochemically confirmed point prevalence abstinence (CO cutoff=5 ppm)

**eTable 6.** Patch and varenicline adherence data (n's and percentages) among participants in the four treatment conditions

**eTable 7.** Pre-quit and post-quit counseling call and visit attendance data (n's and percentages) among participants in the four treatment conditions

**eTable 8.** Means of first week post-quit non-craving withdrawal and craving with statistical adjustment for baseline pre-quit score

### eMethods

**eFigure 1.** Histogram of the Wisconsin Inventory of Smoking Dependence Motives, brief version total score

**eFigure 2.** Associations of demographic and smoking related variables with 52-week point prevalence abstinence

### eReferences

This supplemental material has been provided by the authors to give readers additional information about their work.

**eTable 1.** Medication dosing in the experimental conditions

| <b>Active Condition<sup>a</sup></b> | <b>Weeks 1-12</b>  |              | <b>Weeks 13-24</b> |              |
|-------------------------------------|--------------------|--------------|--------------------|--------------|
|                                     | <b>Varenicline</b> | <b>Patch</b> | <b>Varenicline</b> | <b>Patch</b> |
| 12-week Varenicline-only            | Active             | Placebo      | Placebo            | Placebo      |
| 12-week Varenicline + Patch         | Active             | Active       | Placebo            | Placebo      |
| 24-week Varenicline-only            | Active             | Placebo      | Active             | Placebo      |
| 24-week Varenicline + Patch         | Active             | Active       | Active             | Active       |

<sup>a</sup> All participants were given 24 weeks of pills and 26 weeks of patches (active and/or placebo medications) to mask treatment assignment. Patch treatment began two weeks before the target quit day and extended to post-quit Week 24.

**eTable 2A.** Results for logistic regression analyses under four assumptions about missing outcomes, biochemically-confirmed 7-day point prevalence abstinence rates (CO cutoff=5 ppm) at week 23

|                  | MAR (Multiple Imputation) |      |         | MI-2 <sup>a</sup> |      |         | MI-5 <sup>b</sup> |      |         | Missing=Smoking |      |         |
|------------------|---------------------------|------|---------|-------------------|------|---------|-------------------|------|---------|-----------------|------|---------|
|                  | b                         | se   | P-value | b                 | se   | P-value | b                 | se   | P-value | b               | se   | P-value |
| Intercept        | -1.048                    | .136 | <.001   | -1.133            | .086 | <.001   | -1.229            | .086 | <.001   | -1.311          | .084 | <.001   |
| Patch            | .137                      | .089 | .13     | .086              | .069 | .21     | .095              | .068 | .16     | .089            | .067 | .18     |
| Duration         | .032                      | .077 | .68     | .036              | .068 | .59     | .047              | .068 | .49     | .060            | .067 | .37     |
| Patch x Duration | .065                      | .077 | .40     | .049              | .068 | .47     | .034              | .067 | .62     | .015            | .067 | .83     |
| Site             | .376                      | .241 | .14     | .326              | .151 | .03     | .346              | .141 | .01     | .351            | .140 | .01     |

<sup>a</sup> A pattern mixture model in which the odds of abstinence as defined by the probabilities of the multiple imputation model were reduced by a factor of 2 if the outcome was missing

<sup>b</sup> A pattern mixture model in which the odds of abstinence as defined by the probabilities of the multiple imputation model were reduced by a factor of 5 if the outcome was missing

**eTable 2B.** Results for logistic regression analyses under four assumptions about missing outcomes, biochemically-confirmed 7-day point prevalence abstinence rates (CO cutoff=5 ppm) at week 52

|                  | MAR (Multiple Imputation) |      |         | MI-2 <sup>a</sup> |      |         | MI-5 <sup>b</sup> |      |         | Missing=Smoking |      |         |
|------------------|---------------------------|------|---------|-------------------|------|---------|-------------------|------|---------|-----------------|------|---------|
|                  | b                         | se   | P-value | b                 | se   | P-value | b                 | se   | P-value | b               | se   | P-value |
| Intercept        | -1.093                    | .109 | <.001   | -1.244            | .093 | <.001   | -1.402            | .093 | <.001   | -1.534          | .090 | <.001   |
| Patch            | -.030                     | .096 | .76     | .009              | .072 | .90     | .017              | .074 | .82     | .016            | .073 | .82     |
| Duration         | .006                      | .086 | .95     | -.037             | .074 | .62     | -.005             | .071 | .94     | .012            | .073 | .87     |
| Patch x Duration | .048                      | .092 | .61     | .076              | .073 | .30     | .046              | .073 | .53     | .015            | .073 | .84     |
| Site             | .164                      | .156 | .30     | .157              | .161 | .33     | .175              | .166 | .29     | .178            | .153 | .24     |

<sup>a</sup> A pattern mixture model in which the odds of abstinence as defined by the probabilities of the multiple imputation model were reduced by a factor of 2 if the outcome was missing

<sup>b</sup> A pattern mixture model in which the odds of abstinence as defined by the probabilities of the multiple imputation model were reduced by a factor of 5 if the outcome was missing

**eTable 3.** Biochemically confirmed (CO ≤ 5 ppm) 7-day point prevalence abstinence rates at weeks 23 and 52, and prolonged abstinence by treatment main effects, with the 4 prespecified covariates

| Post-Quit Abstinence Measure                                                | Treatment Main Effect Abstinence Rates, N Abstinent (%) |                                            |                                 |                  | Abstinence Risk Difference (95% CI) P-Value <sup>a</sup> |                      |                                 |                      | Covariate-Adjusted Odds Ratio (95% CI) <sup>b</sup> |                                 |                                        |
|-----------------------------------------------------------------------------|---------------------------------------------------------|--------------------------------------------|---------------------------------|------------------|----------------------------------------------------------|----------------------|---------------------------------|----------------------|-----------------------------------------------------|---------------------------------|----------------------------------------|
|                                                                             | Medication Type Main Effect                             |                                            | Medication Duration Main Effect |                  | Medication Type Main Effect                              | P Value <sup>b</sup> | Medication Duration Main Effect | P Value <sup>b</sup> | Medication Type Main Effect                         | Medication Duration Main Effect | Medication Type X Duration Interaction |
|                                                                             | Varenicline + Active Patch (Combo) (N=625)              | Varenicline + Placebo Patch (Mono) (N=626) | 24 weeks (N=622)                | 12 weeks (N=629) | Combo vs Mono                                            |                      | 24 weeks vs 12 weeks            |                      |                                                     |                                 |                                        |
| Primary Outcome: 7-Day Point Prevalence Abstinence at 52 Weeks <sup>c</sup> | 152 (24.3%)                                             | 155 (24.8%)                                | 154 (24.8%)                     | 153 (24.3)       | 0.4 (-4.3 to 5.2)                                        | .82                  | 0.4 (-5.2 to 4.3)               | .75                  | 1.0 (0.9-1.1)                                       | 1.0 (0.9-1.2)                   | 1.0 (0.9-1.2)                          |
| 7-Day Point Prevalence Abstinence at 23 Weeks <sup>c</sup>                  | 156 (25.0%)                                             | 136 (21.7%)                                | 152 (24.4%)                     | 140 (22.3%)      | -3.2 (-7.9 to 1.5)                                       | .19                  | -2.2 (-6.9 to 2.5)              | .30                  | 1.1 (0.96-1.2)                                      | 1.1 (0.9-1.2)                   | 1.0 (0.9-1.2)                          |
| Prolonged Abstinence (23 Weeks) <sup>d</sup>                                | 139 (22.2%)                                             | 137 (21.9%)                                | 138 (22.2%)                     | 138 (21.9)       | -0.4 (-5.0 to 4.2)                                       | .94                  | -0.3 (-4.8 to 4.4)              | .81                  | 1.0 (0.9-1.2)                                       | 1.0 (0.9-1.2)                   | 1.1 (0.9-1.2)                          |
| Prolonged Abstinence (52 Weeks) <sup>e</sup>                                | 104 (16.6%)                                             | 101 (16.1%)                                | 103 (16.6%)                     | 102 (16.2)       | -0.5 (-4.6 to 3.6)                                       | .87                  | -0.3 (-4.5 to 3.8)              | .77                  | 1.0 (0.9-1.2)                                       | 1.0 (0.9-1.2)                   | 1.1 (0.97-1.3)                         |

<sup>a</sup>Main effect comparisons of abstinence risk differences were tested via SAS Proc Freq, which provides risk differences (RDs) and 95% confidence limits of RDs. <sup>b</sup>Based on logistic regression analysis controlling for 4 binary prespecified covariates (Site, Gender, Race, and Fagerstrom Test of Cigarette Dependence<sup>26, 27</sup> (FTCD) Item 1). <sup>c</sup>Abstinence self-

report was biochemically confirmed via exhaled carbon monoxide (CO) testing with abstinence confirmed with a CO value of  $\leq 5$  parts per million (ppm). <sup>d</sup>Prolonged abstinence (23 weeks) = no smoking from Day 7 to Week 23 after the target quit day. <sup>e</sup>Prolonged abstinence (52 weeks) = no smoking from Day 7 to Week 52 after the target quit day.

---

**eTable 4.** Biochemically-confirmed 7-day point prevalence abstinence rates (CO cutoff=5 ppm) at weeks 23 and 52, and prolonged abstinence by the 4 treatment conditions, with the 4 prespecified covariates

| Post-Quit Abstinence Measure                                                | Treatment Group Abstinence Rates, N Abstinent (%)     |                                                      |                                                       |                                                      | Covariate-Adjusted Abstinence Risk Difference (95% CI) P-Value <sup>a</sup> |         |                                                  |         |                                                               |         | Covariate-Adjusted Odds Ratio (95% CI) <sup>b</sup> |               |               |
|-----------------------------------------------------------------------------|-------------------------------------------------------|------------------------------------------------------|-------------------------------------------------------|------------------------------------------------------|-----------------------------------------------------------------------------|---------|--------------------------------------------------|---------|---------------------------------------------------------------|---------|-----------------------------------------------------|---------------|---------------|
|                                                                             | A:<br>Varenicline + Placebo Patch<br>12 weeks (N=315) | B:<br>Varenicline + Active Patch<br>12 weeks (N=314) | C:<br>Varenicline + Placebo Patch<br>24 weeks (N=310) | D:<br>Varenicline + Active Patch<br>24 weeks (N=309) | Patch Effect (at 12 weeks Duration)<br>A vs. B                              | P Value | Duration Effect (of Varenicline Only)<br>A vs. C | P Value | 24-Week Combo Patch Effect vs. 12-Week monotherapy<br>A vs. D | P Value | A vs. B                                             | A vs. C       | A vs. D       |
| Primary Outcome: 7-Day Point Prevalence Abstinence at 52 Weeks <sup>c</sup> | 79 (25.1%)                                            | 74 (23.6%)                                           | 76 (24.5%)                                            | 78 (25.2%)                                           | 2.1 (-4.4 to 8.7)                                                           | .53     | 0.4 (-6.2 to 7.0)                                | .91     | 0.2 (-6.5 to 6.8)                                             | .96     | 0.9 (0.6-1.3)                                       | 1.0 (0.7-1.4) | 1.0 (0.7-1.5) |
| 7-Day Point Prevalence Abstinence at 23 Weeks <sup>c</sup>                  | 66 (21.0%)                                            | 74 (23.6%)                                           | 70 (22.6%)                                            | 82 (26.5%)                                           | -1.8 (-8.1 to 4.2)                                                          | .58     | -1.9 (-8.1 to 4.2)                               | .54     | -4.9 (-11.4 to 1.6)                                           | .14     | 1.2 (0.8-1.7)                                       | 1.1 (0.8-1.6) | 1.4 (0.9-2.0) |
| Prolonged Abstinence (23 Weeks) <sup>d</sup>                                | 72 (22.9%)                                            | 66 (21.0%)                                           | 65 (21.0%)                                            | 73 (23.6%)                                           | 2.0 (-4.1 to 7.8)                                                           | .51     | 1.7 (-4.3 to 7.8)                                | .58     | -0.2 (-6.5 to 6.0)                                            | .94     | 0.9 (0.6-1.3)                                       | 0.9 (0.6-1.3) | 1.0 (0.7-1.5) |
| Prolonged Abstinence (52 Weeks) <sup>e</sup>                                | 55 (17.5%)                                            | 47 (15.0%)                                           | 46 (14.8%)                                            | 57 (18.4%)                                           | 2.3 (-3.1 to 7.7)                                                           | .41     | 2.0 (-3.3 to 7.3)                                | .46     | -0.8 (-6.6 to 5.0)                                            | .79     | 0.8 (0.5-1.2)                                       | 0.8 (0.5-1.3) | 1.1 (0.7-1.6) |

<sup>a</sup>Pairwise comparisons of abstinence risk differences were tested via SAS Proc Genmod, which provides least squares risk differences and 95% confidence limits for the risk differences controlling for 4 binary prespecified covariates (Site, Gender, Race, and Fagerstrom Test of Cigarette Dependence<sup>26, 27</sup> (FTCD) Item 1. <sup>b</sup>Based on logistic regression analysis controlling for 4 a priori covariates. <sup>c</sup>Abstinence self-report was biochemically confirmed via exhaled carbon monoxide (CO) testing with abstinence confirmed with a CO value of  $\leq 5$  parts per million (ppm). <sup>d</sup>Prolonged abstinence (23 weeks) = no smoking from Day 7 to Week 23 after the target quit day. <sup>e</sup>Prolonged abstinence (52 weeks) = no smoking from Day 7 to Week 52 after the target quit day.

Note: Statistically significant covariates for each of the primary and secondary outcomes:

Week 52 Abstinence: Race ( $p=.007$ ); FTCD Item 1( $p=.009$ )

Week 23 Abstinence: Race ( $p<.001$ )

Prolonged Abstinence (Week 23): Site ( $p=.007$ ); Race ( $p<.001$ ); FTCD Item 1 ( $p=.002$ )

Prolonged Abstinence (Week 52): Race ( $p<.001$ ); FTCD Item 1 ( $p<.001$ )

---



**eTable 5.** Moderation analyses for post hoc covariates and week 52 biochemically confirmed point prevalence abstinence (CO cutoff=5 ppm)<sup>a</sup>

| Moderator                                                            | Model Interaction Effects |                     |                      |                     |
|----------------------------------------------------------------------|---------------------------|---------------------|----------------------|---------------------|
|                                                                      | Patch X Moderator         |                     | Duration X Moderator |                     |
|                                                                      | P-value                   | Odds Ratio (95% CI) | P-value              | Odds Ratio (95% CI) |
| <b>Gender</b> (n=1251)<br>Female (n=675)<br>Male (n=576)             | .62                       | 1.1 (0.8 to 1.4)    | .82                  | 1.0 (0.8 to 1.4)    |
| <b>Race</b> (n=1250)<br>White (n=867)<br>Non-White (n=383)           | .35                       | 0.9 (0.6 to 1.2)    | .69                  | 0.9 (0.7 to 1.3)    |
| <b>Income</b> (n=1174)<br><\$20,000 (n=311)<br>≥\$20,000 (n=863)     | .28                       | 1.2 (0.8 to 1.8)    | .64                  | 0.9 (0.6 to 1.3)    |
| <b>FTCD Total Score</b> (n=1247)<br>0-4 (n=492)<br>5-10 (n=755)      | .63                       | 0.9 (0.7 to 1.2)    | .69                  | 1.1 (0.8 to 1.4)    |
| <b>Age (years)</b> (n=1251)<br>18-49 (n=622)<br>50+ (n=629)          | .37                       | 1.1 (0.9 to 1.5)    | .54                  | 1.1 (0.8 to 1.5)    |
| <b>Carbon Monoxide (ppm)</b> (n=1251)<br>5-14 (n=609)<br>15+ (n=642) | .25                       | 1.2 (0.9 to 1.6)    | .95                  | 1.0 (0.8 to 1.3)    |

| Moderator                                                                                       | Model Interaction Effects |                     |                      |                     |
|-------------------------------------------------------------------------------------------------|---------------------------|---------------------|----------------------|---------------------|
|                                                                                                 | Patch X Moderator         |                     | Duration X Moderator |                     |
|                                                                                                 | P-value                   | Odds Ratio (95% CI) | P-value              | Odds Ratio (95% CI) |
| <b>Home Smoking<sup>b</sup></b> (n=1250)<br>No (n=770)<br>Yes (n=480)                           | .83                       | 1.0 (0.7 to 1.3)    | .43                  | 1.1 (0.8 to 1.5)    |
| <b>Prior Use of Cessation Medications<sup>c</sup></b> (n=1250)<br>No (n=258)<br>Yes (n=992)     | .61                       | 1.1 (0.8 to 1.5)    | .78                  | 1.0 (0.7 to 1.3)    |
| <b>Menthol Smoking</b> (n=1250)<br>No (n=568)<br>Yes (n=682)                                    | .10                       | 0.8 (0.6 to 1.0)    | .86                  | 1.0 (0.8 to 1.4)    |
| <b>FTCD Item 1</b> (n=1248)<br>Smoke > 30 Min (n=224)<br>Smoke Within 30 Min of Waking (n=1024) | .41                       | 1.2 (0.8 to 1.6)    | .85                  | 1.0 (0.7 to 1.4)    |
| <b>WISDM37 Primary Dependence Motives</b> (n=1248)<br>Low (n=634)<br>High (n=614)               | .19                       | 0.8 (0.6 to 1.1)    | .06                  | 1.3 (0.99 to 1.8)   |
| <b>WISDM37 Secondary Dependence Motives</b> (n=1243)<br>Low (n=634)<br>High (n=614)             | .20                       | 0.8 (0.6 to 1.1)    | .12                  | 1.3 (0.9 to 1.7)    |

Abbreviation: FTCD=Fagerstrom Test of Cigarette Dependence<sup>26, 27</sup>. WISDM37=Wisconsin Inventory of Smoking Dependence Motives, Brief Version<sup>28</sup>.

<sup>a</sup>Covariate effects were tested in a series of multivariable logistic regression analyses with the primary outcome (7-day point-prevalence abstinence at 52 Weeks post-target quit day [carbon monoxide  $\leq$ 5 ppm]) as the dependent variable, with effect coding for Patch and Duration. Moderators were dummy-coded. The multivariable model included Patch and

Duration main effects, the moderator main effect, the Patch X moderator interaction, and the Duration X moderator interaction. <sup>b</sup>Defined as presence of anyone who smokes living in the home of the participant. <sup>c</sup>Prior use of varenicline or nicotine patch, gum, or lozenge.

**eTable 6.** Patch and varenicline adherence data (n's and percentages) among participants in the four treatment conditions

| Assessment Timepoint | Patch Adherence Rates, <sup>a</sup> N (%)<br>by Treatment Condition <sup>b</sup> |                                                               |                                                                     |                                                                    | Varenicline (Pill) Adherence Rates, <sup>a</sup> N (%)<br>by Treatment Condition <sup>b</sup> |                                                                    |                                                                     |                                                                    |
|----------------------|----------------------------------------------------------------------------------|---------------------------------------------------------------|---------------------------------------------------------------------|--------------------------------------------------------------------|-----------------------------------------------------------------------------------------------|--------------------------------------------------------------------|---------------------------------------------------------------------|--------------------------------------------------------------------|
|                      | A:<br>Varenicline +<br>Placebo<br>Patch<br>12 weeks<br>(N=315)                   | B:<br>Varenicline +<br>Active<br>Patch<br>12 weeks<br>(N=314) | C:<br>Varenicline +<br>Placebo<br>Patch<br>-<br>24 weeks<br>(N=311) | D:<br>Varenicline +<br>Active<br>Patch<br>-<br>24 weeks<br>(N=311) | A:<br>Varenicline +<br>Placebo<br>Patch<br>-<br>12 weeks<br>(N=315)                           | B:<br>Varenicline +<br>Active<br>Patch<br>-<br>12 weeks<br>(N=314) | C:<br>Varenicline +<br>Placebo<br>Patch<br>-<br>24 weeks<br>(N=311) | D:<br>Varenicline +<br>Active<br>Patch<br>-<br>24 weeks<br>(N=311) |
| Target Quit Day      | 238 (75.6)                                                                       | 247 (78.7)                                                    | 244 (78.5)                                                          | 234 (75.2)                                                         | 241 (75.2)                                                                                    | 254 (80.9)                                                         | 252 (81.0)                                                          | 285 (75.6)                                                         |
| Week 2               | 211 (67.0)                                                                       | 209 (66.6)                                                    | 219 (70.4)                                                          | 213 (68.5)                                                         | 219 (69.5)                                                                                    | 214 (68.2)                                                         | 240 (77.2)                                                          | 213 (68.5)                                                         |
| Week 4               | 207 (65.7)                                                                       | 203 (64.6)                                                    | 211 (67.8)                                                          | 196 (63.0)                                                         | 228 (72.4)                                                                                    | 216 (68.8)                                                         | 223 (71.7)                                                          | 201 (64.6)                                                         |
| Week 8               | 170 (64.0)                                                                       | 162 (51.6)                                                    | 178 (57.2)                                                          | 155 (49.8)                                                         | 195 (61.9)                                                                                    | 184 (58.6)                                                         | 201 (64.6)                                                          | 163 (52.4)                                                         |
| Week 11              | 163 (51.7)                                                                       | 152 (48.4)                                                    | 167 (53.7)                                                          | 147 (47.3)                                                         | 181 (57.5)                                                                                    | 173 (55.1)                                                         | 193 (62.1)                                                          | 160 (51.4)                                                         |
| Week 23              | 128 (40.6)                                                                       | 132 (42.0)                                                    | 142 (45.7)                                                          | 138 (44.4)                                                         | 149 (47.3)                                                                                    | 148 (47.1)                                                         | 173 (55.6)                                                          | 142 (45.7)                                                         |

<sup>a</sup>Past week adherence for the patch was defined as using one patch per day for 6 or 7 days; adherent use of the pill was defined as taking 1 or 2 pills per day for 6 or 7 days. Missing adherence data were re-coded as non-adherent.

<sup>b</sup>All participants received active varenicline (pill); standard duration of pill and patch medications=12 weeks; extended duration of pill and patch medications=24 weeks post-quit

**eTable 7.** Pre-quit and post-quit counseling call and visit attendance (n’s and percentages) among participants in the four treatment conditions

| Assessment Timepoint                                                     | Attendance Rates, N (%)<br>by Treatment Condition <sup>a</sup>        |                                                                      |                                                                       |                                                                      |
|--------------------------------------------------------------------------|-----------------------------------------------------------------------|----------------------------------------------------------------------|-----------------------------------------------------------------------|----------------------------------------------------------------------|
|                                                                          | A:<br>Varenicline<br>+<br>Placebo<br>Patch<br><br>12 weeks<br>(N=315) | B:<br>Varenicline<br>+<br>Active<br>Patch<br><br>12 weeks<br>(N=314) | C:<br>Varenicline<br>+<br>Placebo<br>Patch<br><br>24 weeks<br>(N=311) | D:<br>Varenicline<br>+<br>Active<br>Patch<br><br>24 weeks<br>(N=311) |
| Pre-Quit Call and Visit Attendance<br>(Maximum=2 Sessions) <sup>b</sup>  |                                                                       |                                                                      |                                                                       |                                                                      |
| 0-1 Sessions                                                             | 49 (15.6)                                                             | 50 (15.9)                                                            | 39 (12.5)                                                             | 48 (15.4)                                                            |
| 2 Sessions                                                               | 266 (84.4)                                                            | 264 (84.1)                                                           | 272 (87.5)                                                            | 263 (84.6)                                                           |
| Post-Quit Call and Visit Attendance<br>(Maximum=4 Sessions) <sup>c</sup> |                                                                       |                                                                      |                                                                       |                                                                      |
| 0-2 Sessions                                                             | 94 (29.8)                                                             | 83 (26.4)                                                            | 86 (27.7)                                                             | 96 (30.9)                                                            |
| 3-4 Sessions                                                             | 221 (70.2)                                                            | 231 (73.6)                                                           | 225 (72.3)                                                            | 215 (69.1)                                                           |

<sup>a</sup>All participants received active varenicline (pill); standard duration of pill and patch medications=12 weeks; extended duration of pill and patch medications=24 weeks post-quit.

<sup>b</sup>The pre-quit visit was two weeks before the Target Quit Date (TQD); the pre-quit call was one week before the TQD.

<sup>c</sup>The post-quit visits occurred on the TQD and at week 2 post-quit; the post-quit calls occurred at weeks 4 and 8 post-quit.

**eTable 8.** Means of first week post-quit non-craving withdrawal and craving with statistical adjustment for baseline pre-quit score

| Condition<br><br>(Number of Participants Providing<br>Withdrawal Data) | Withdrawal Measures <sup>a</sup>    |                        |
|------------------------------------------------------------------------|-------------------------------------|------------------------|
|                                                                        | Non-Craving Withdrawal <sup>b</sup> | Craving <sup>c</sup>   |
|                                                                        | Mean (SD) <sup>d</sup>              | Mean (SD) <sup>d</sup> |
| 12-week Varenicline + Placebo Patch<br>(N=276)                         | 2.7 (0.7)                           | 3.5 (1.2)              |
| 12-week Varenicline + Active Patch<br>(N=289)                          | 2.6 (0.7)                           | 3.3 (1.0)              |
| 24-week Varenicline + Placebo Patch<br>(N=84)                          | 2.6 (0.7)                           | 3.3 (1.0)              |
| 24-week Varenicline + Active Patch<br>(N=276)                          | 2.6 (0.7)                           | 3.4 (1.2)              |

<sup>a</sup>Withdrawal and craving measures consisted of items rated with the following instructions: “Please rate how much you have felt each of the following over the past 24 hours on a scale from 1 to 7 where 1 is Not at all and 7 is Extremely” assessed via interactive voice response (IVR) calls.

<sup>b</sup>Non-Craving Withdrawal = mean of four items: anxious, worried or stressed; angry or irritated; sad or unhappy; can’t concentrate or think clearly.

<sup>c</sup>Craving = means of two items: bothered by desire to smoke; trouble getting cigarettes off your mind.

<sup>d</sup>Means and SDs are based on least squares means from a regression model that included the baseline (pre-quit) score as a covariate.

## eMethods

A sensitivity analysis evaluated estimated treatment effects when making different assumptions about the 7-day point-prevalence abstinence at Weeks 23 and 52 for subjects with missing outcomes. The assumptions ranged from a missing-at-random (MAR) assumption, in which case a multiple imputation strategy was used, to a missing not-at-random (MNAR) condition in which missingness = smoking (no abstinence), as is commonly assumed in tobacco cessation studies. Additional conditions of MNAR were implemented using a pattern mixture model<sup>1,2,3</sup> whereby the odds of abstinence as defined by the probabilities of the multiple imputation model were reduced by factors of 2 and 5 if the outcome was missing versus not. These latter two conditions can be viewed as intermediate conditions on a continuum defined by MAR on one end to missing = smoking at the other end.

The multiple imputation strategy was applied using ten imputed datasets. The imputation model included as predictors the treatment variables and the site covariate as well as the variables gender, race, ethnicity, income, education, marital status, cigarettes smoked/day, heaviest smoking, years of smoking, age when first smoked a cigarette, age that daily smoking started, items from the Fagerstrom Tests of Cigarette Dependence<sup>4,5</sup> at baseline, the Heaviness of Smoking Index,<sup>6</sup> use of menthol cigarettes, total number of quit attempts, the longest prior quit attempt, any cessation medications previously used, prior use of nicotine replacement therapy (NRT), prior use of varenicline, smokers in the home, being around smokers, motivation to quit, confidence in quitting, positive affect and negative affect scales from the Positive and Negative Affect Schedule,<sup>7</sup> and scores from the Depression Anxiety Stress Scales questionnaire.<sup>8</sup> The imputation analyses were conducted using SPSS version 27.<sup>9</sup>

Supplemental Tables 2a and 2b display the results for the four analyses ordered in terms of the degree to which missingness was assumed to reflect smoking. Estimates for the first three analyses are based on the application of Rubin's rules<sup>10</sup> to provide pooled results across the imputed datasets.

**eFigure 1.** Histogram of the Wisconsin Inventory of Smoking Dependence Motives, brief version<sup>11</sup> total score

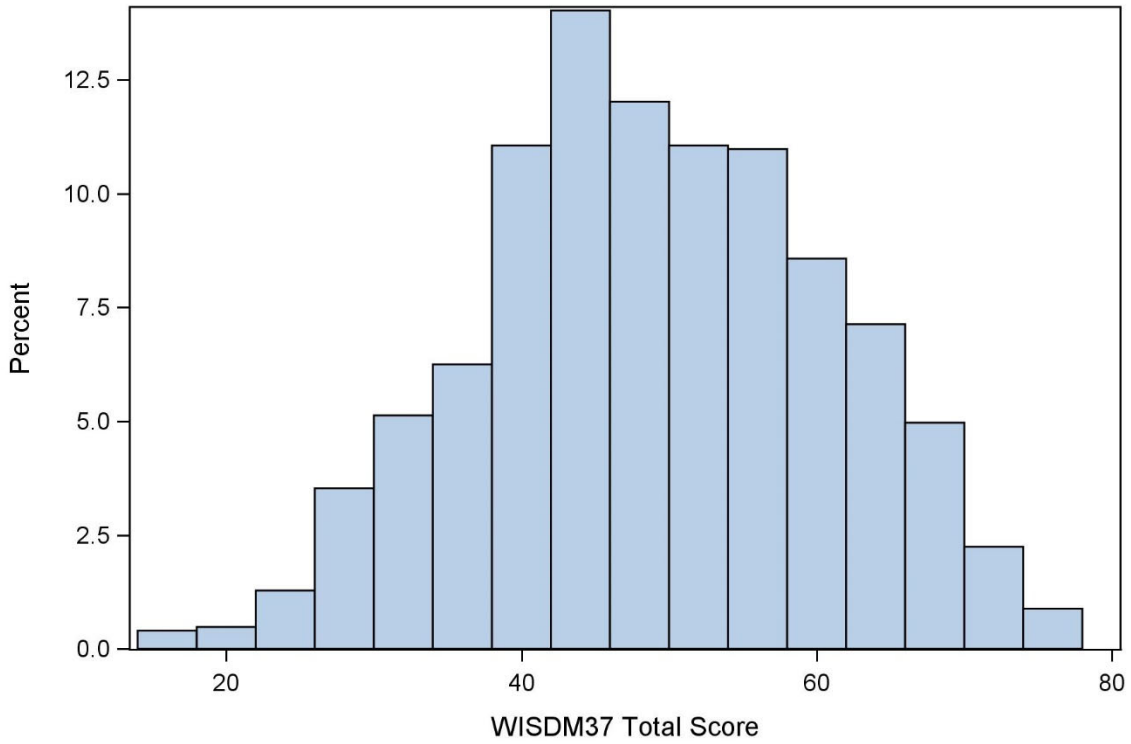



**eFigure 2.** Associations of demographic and smoking variables with 52-week abstinence

[See next page for full page figure]

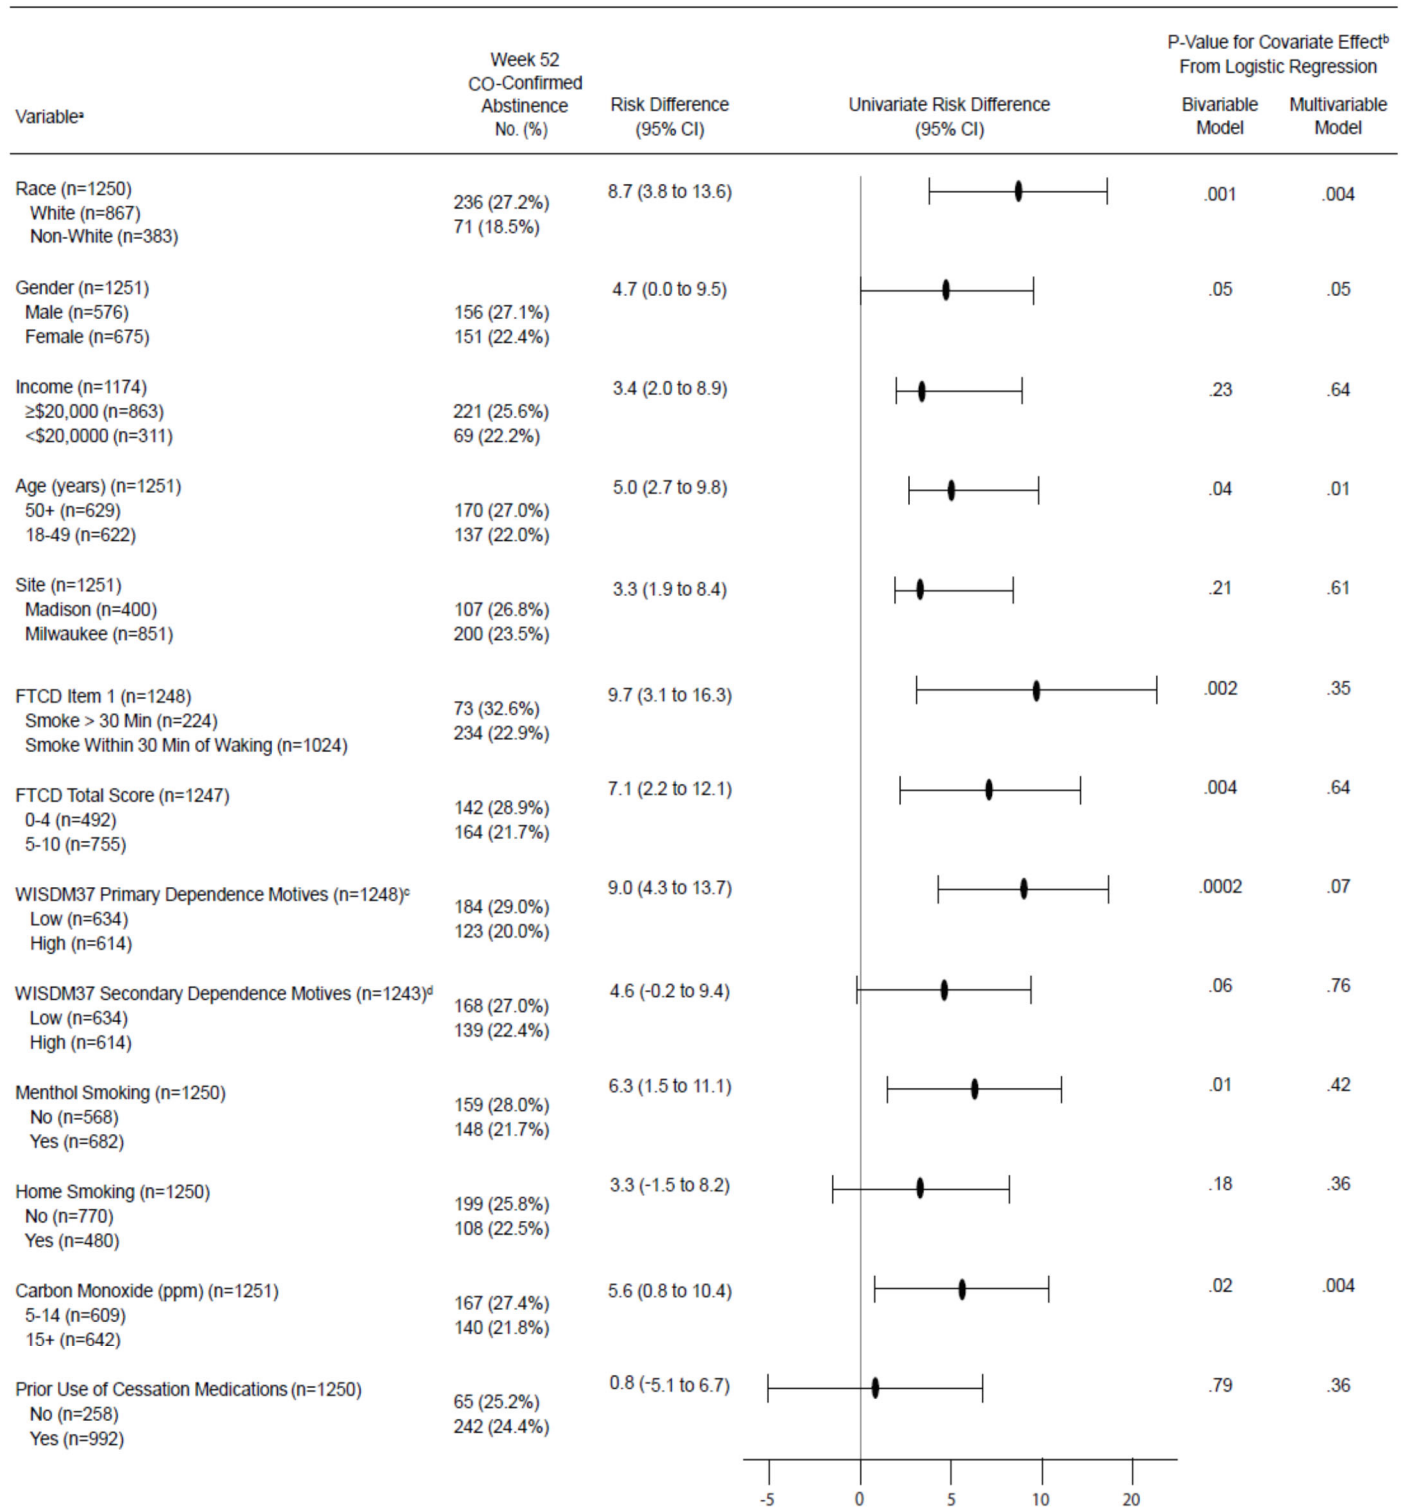

Note: For each variable, two groups or variable values were compared on week 52 CO-confirmed abstinence. For purposes of display, the first (top) group of each of the two groups formed by variable coding was the one that was associated with an increase in abstinence.

Abbreviation: FTCD=Fagerstrom Test of Cigarette Dependence<sup>28, 29</sup>. WISDM37=Wisconsin Inventory of Smoking Dependence Motives, Brief Version<sup>23</sup>; see eFigure 1 for a histogram of WISDM37.

<sup>a</sup>See Table 1 for definitions of variables.

<sup>b</sup>Covariate effects were tested in a series of bivariable and multivariable logistic regression analyses with the primary outcome (7-day point-prevalence abstinence at 52 Weeks post-target quit day [CO ≤ 5 ppm]) as the dependent variable, with no treatment coding. The multivariable model included all the covariates in the table.

<sup>c</sup>Low and high values on the WISDM37 Primary Dependence Motives scale were based on a median split (Median=5.1875).

<sup>d</sup>Low and high values on the WISDM37 Secondary Dependence Motives scale were based on a median split (Median=4.0).

## eReferences

1. Little RJ, Wang Y. Pattern-mixture models for multivariate incomplete data with covariates. *Biometrics*. 1996;52(1):98-111.
2. Hedeker D, Mermelstein RJ, Demirtas H. Analysis of binary outcomes with missing data: missing = smoking, last observation carried forward, and a little multiple imputation. *Addiction*. 2007;102(10):1564-1573. doi:10.1111/j.1360-0443.2007.01946.x
3. Leurent B, Gomes M, Faria R, Morris S, Grieve R, Carpenter JR. Sensitivity Analysis for Not-at-Random Missing Data in Trial-Based Cost-Effectiveness Analysis: A Tutorial [published correction appears in *Pharmacoeconomics*. 2019 Mar 9;]. *Pharmacoeconomics*. 2018;36(8):889-901. doi:10.1007/s40273-018-0650-5
4. Heatherton TF, Kozlowski LT, Frecker RC, Fagerström KO. The Fagerström Test for Nicotine Dependence: a revision of the Fagerström Tolerance Questionnaire. *Br J Addict*. 1991;86(9):1119-1127. doi:10.1111/j.1360-0443.1991.tb01879.x
5. Fagerström K. Determinants of tobacco use and renaming the FTND to the Fagerstrom Test for Cigarette Dependence. *Nicotine Tob Res*. 2012;14(1):75-78. doi:10.1093/ntr/ntr137
6. Heatherton TF, Kozlowski LT, Frecker RC, Rickert W, Robinson J. Measuring the heaviness of smoking: using self-reported time to the first cigarette of the day and number of cigarettes smoked per day. *Br J Addict*. 1989;84(7):791-799. doi:10.1111/j.1360-0443.1989.tb03059.x
7. Watson D, Clark LA, Tellegen A. Development and validation of brief measures of positive and negative affect: the PANAS scales. *J Pers Soc Psychol*. 1988;54(6):1063-1070. doi:10.1037//0022-3514.54.6.1063
8. Lovibond SH; Lovibond PF. *Manual for the Depression Anxiety Stress Scales*. (2nd. Ed.) Sydney: Psychology Foundation, 1995.
9. IBM Corp. Released 2020. *IBM SPSS Statistics for Windows, Version 27.0*. Armonk, NY: IBM Corp
10. Rubin DB. *Multiple Imputation for Nonresponse in Surveys*. New York, NY: John Wiley & Sons; 1987
11. Smith SS, Piper ME, Bolt DM, et al. Development of the Brief Wisconsin Inventory of Smoking Dependence Motives. *Nicotine Tob Res*. 2010;12(5):489-499. doi: 10.1093/ntr/ntq032
