# Supplementary material
Source: PubMed Central journal article supplement (PMC8527361)
Supplement: jama-e2115333-s003.pdf [file jama-e2115333-s003.pdf]

## Data Sharing Statement

Baker. Effects of Combined Varenicline With Nicotine Patch, and of Extended Treatment Duration, on Smoking Cessation. *JAMA*. Published October 19, 2021.  
doi:10.1001/jama.2021.15333

### Data

**Data available:** Yes

**Data types:** Deidentified participant data, Data dictionary

**How to access data:** [tbb@ctri.medicine.wisc.edu](mailto:tbb@ctri.medicine.wisc.edu)

**When available:** beginning date: 06-01-2023, end date: 12-30-2026

### Supporting Documents

**Document types:** None

### Additional Information

**Who can access the data:** researchers whose data use is approved

**Types of analyses:** meta-analyses, investigation of specific questions judged to be worthwhile by study authors

**Mechanisms of data availability:** via request to the authors and with approval by IRB and approval of the University of Wisconsin Center for Tobacco Research and Intervention leadership and trial PI and with a signed access agreement

**Any additional restrictions:** associated genetic data are not yet available and sharing rules have not been developed for them
